# Supplementary material for: Allene oxide synthase, allene oxide cyclase and jasmonic acid levels in Lotus japonicus nodules
Source: PubMed Central journal article supplement (PMC5755929; doi:10.1371/journal.pone.0190884), 2018-01-05
Supplement: pone.0190884.s001.pdf [file pone.0190884.s001.pdf]

**S1 Fig. Phylogenetic tree of the CYP74 enzyme family.** The family encompasses allene oxide synthases (AOS; CYP74A and C), hydroperoxide lyases (HPL; CYP74B and C) and divinylether synthases (DES; CYP74B, D, H and Q). *L. japonicus* AOS1 and AOS2 belong to the 13-AOS group (based on Stumpe and Feussner [38]). Accession numbers of the sequences used in the analysis: *A. thaliana* AtAOS, CAA63266; AtHPL, AAC69871; *Allium sativum* AsDES, CAI30435; *Citrus sinensis* CiAOS, AAO72741; *Cucumis melo* CmAOS, AAM66138; CmHPL, AAK54282; *Cucumis sativus* CsHPL1, AAF64041; CsHPL2, AF229812; *Hordeum vulgare* HvAOS1, CAB86384; HvAOS2, CAB86383; HvHPL, CAC82980; *Linum usitatissimum* LuAOS, AAA03353; *Musa acuminata* MaHPL, CAB39331; *Medicago sativa* MsHPL1, CAB54847; MsHPL2, CAB54848; MsHPL3, CAB54849; *M. truncatula* MtAOS, CAC86897; MtHPL1 CAC86898; MtHPL2, CAC86899; *Nicotiana attenuata* NaAOS2, CAC82911; NaHPL, CAC91565; *Nicotiana tabacum* NtDES, AAL40900; *Oryza sativa* OsAOS1, AAL38184; OsAOS2, AAP50956; *Parthenium argentatum* PaAOS, CAA55025; *Prunus dulcis* PdHPL, CAE18065; *Psidium guajava* PgLHPL, AAK15070; *Physcomitrella patens* PpAOS, CAC86919; PpHPL, CAC86920; *Solanum lycopersicum* SIAOS1, CAB88032; SIAOS2, AAF67141; SIAOS3, AAN76867; SICYP74, AAL86702; SIDES, AAG42261; SIHPL, AAF67142; *Capsicum annuum* CaHPL2, AAA97465; *Solanum tuberosum* StHPL, CAC44040; StAOS2, ABD15175; StAOS3, CAI30876; StDES, CAC28152; *Triticum aestivum* TaAOS, AAO43440; *Zea mays* ZmHPL, from patent WO00/22145; *Selaginella moellendorffii* SmCYP74M1 (DES), XP\_002979266; SmCYP74M3 (DES), XP\_002964012.

The evolutionary history was inferred using the UPGMA method [S1]. The optimal tree with the sum of branch length = 9.80131868 is shown. The tree is drawn to scale, with branch lengths in the same units as those of the evolutionary distances used to infer the phylogenetic tree. The evolutionary distances were computed using the Poisson correction method [S2] and are in the units of the number of amino acid substitutions per site. The analysis involved 46 amino acid sequences. All ambiguous positions were removed for each sequence pair. There were a total of 595 positions in the final dataset. Evolutionary analyses were conducted in MEGA7 [S3].

It should be noted that the phylogeny of CYP74 genes in Bryophyta and Lycopodiophyta is not completely understood yet [S4].

- S1. Sneath PHA, Sokal RR (1973). Numerical Taxonomy. Freeman, San Francisco.
- S2. Felsenstein J (1985). Confidence limits on phylogenies: An approach using the bootstrap. *Evolution* 39:783–791.
- S3. Kumar S, Stecher G, Tamura K (2016). MEGA7: Molecular Evolutionary Genetics Analysis version 7.0 for bigger datasets. *Molecular Biology and Evolution* 33:1870–1874.
- S4. Gorina SS, Toporkova YY, Mukhtarova LS, Smirnova EO, Chechetkin IR, Khairutdinov BI, Gogolev YV, Grechkin AN (2016). Oxylin biosynthesis in spikemoss *Selaginella moellendorffii*: Molecular cloning and identification of divinyl ether synthases CYP74M1 and CYP74M3. *Biochim Biophys Acta* 1861:301–309.
